# Supplementary material
Source: PubMed Central journal article supplement (PMC545560)
Supplement: pnas_102_3_939__1.pdf [file pnas_102_3_939__1.pdf]

## Supporting Derivation

**General Cartesian Form for a Logarithmic Spiral Parametrized by Arc-Length.** The logarithmic spiral is standardly expressed in polar coordinates as:

$$r = \alpha e^{\beta\theta}$$

However, this form is not useful for our purposes because it describes a logarithmic spiral whose pole (point of infinite curvature) is at the origin. We require a form that is general enough to describe a spiral “starting” at an arbitrary initial position  $(x_0, y_0)$ , with initial tangent direction  $\phi_0$ , initial curvature  $\kappa_0$ , and initial rate of change of curvature  $\gamma_0$  at that point. We derive such a form in the complex Cartesian plane.

We begin with the following Cesáro equation, expressing curvature in terms of arc length:

$$\kappa(s) = \frac{1}{bs + a}$$

The values  $a$  and  $b$  are chosen to ensure that the initial curvature and rate of curvature are  $\kappa_0$  and  $\gamma_0$ , respectively. Specifically:

$$a = \frac{1}{\kappa_0} \quad \text{and} \quad b = -\frac{\gamma_0}{\kappa_0^2}$$

The orientation function is then given by:

$$\begin{aligned} \phi(s) &= \phi_0 + \int_0^s \frac{dt}{bt + a} \\ &= \phi_0 + \frac{1}{b} [\log(bs + a) - \log(a)] \end{aligned}$$

and the position  $E(s) = x(s) + iy'(s)$  is given by:

$$\begin{aligned}
E(s) &= E(0) + \int_0^s \exp i \left( \phi_0 + \frac{1}{b} [\log(bt+a) - \log(a)] \right) dt \\
&= E(0) + \exp i \left( \phi_0 - \frac{1}{b} \log(a) \right) \left[ \int_0^s \cos \left( \frac{\log(bt+a)}{b} \right) dt + i \int_0^s \sin \left( \frac{\log(bt+a)}{b} \right) dt \right] \\
&= E(0) + \exp i \left( \phi_0 - \frac{1}{b} \log(a) \right) [I_1 + iI_2]
\end{aligned}$$

In order to obtain the general expression, we need to evaluate the two integrals  $I_1$  and  $I_2$ .

Setting  $u = \frac{1}{b} \log(bt+a)$ , we obtain:

$$I_1 = \int_0^s \cos \left( \frac{\log(bt+a)}{b} \right) dt = \int_{u_1}^{u_2} e^{bu} \cos(u) du$$

where  $u_1 = \frac{1}{b} \log(a)$  and  $u_2 = \frac{1}{b} \log(bs+a)$ . Using integration by parts,

$$\begin{aligned}
I_1 &= e^{bu} \sin(u) \Big|_{u_1}^{u_2} - b \int_{u_1}^{u_2} e^{bu} \sin(u) du \\
&= e^{bu} \sin(u) \Big|_{u_1}^{u_2} - b \left[ -e^{bu} \cos(u) \Big|_{u_1}^{u_2} + b \int_{u_1}^{u_2} e^{bu} \cos(u) du \right] \\
&= e^{bu} \sin(u) \Big|_{u_1}^{u_2} + b e^{bu} \cos(u) \Big|_{u_1}^{u_2} - b^2 I_1
\end{aligned}$$

and, therefore,

$$\begin{aligned}
I_1 &= \frac{1}{1+b^2} e^{bu} \left[ \sin(u) + b \cos(u) \right] \Big|_{u_1}^{u_2} \\
&= \frac{bs+a}{1+b^2} \left[ \sin \left( \frac{\log(bs+a)}{b} \right) + b \cos \left( \frac{\log(bs+a)}{b} \right) \right] - \frac{a}{1+b^2} \left[ \sin \left( \frac{\log(a)}{b} \right) + b \cos \left( \frac{\log(a)}{b} \right) \right]
\end{aligned}$$

Similarly,

$$I_2 = \int_0^s \sin\left(\frac{\log(bt+a)}{b}\right) dt = \int_{u_1}^{u_2} e^{bu} \sin(u) du$$

where  $u_1 = \frac{1}{b} \log(a)$  and  $u_2 = \frac{1}{b} \log(bs+a)$ . Using integration by parts as before,

$$\begin{aligned} I_2 &= -e^{bu} \cos(u) \Big|_{u_1}^{u_2} + b \int_{u_1}^{u_2} e^{bu} \cos(u) du \\ &= -e^{bu} \cos(u) \Big|_{u_1}^{u_2} + b \left[ e^{bu} \sin(u) \Big|_{u_1}^{u_2} - b \int_{u_1}^{u_2} e^{bu} \sin(u) du \right] \\ &= -e^{bu} \cos(u) \Big|_{u_1}^{u_2} + be^{bu} \sin(u) \Big|_{u_1}^{u_2} - b^2 I_2 \end{aligned}$$

and, therefore,

$$\begin{aligned} I_2 &= \frac{1}{1+b^2} e^{bu} [b \sin(u) - \cos(u)] \Big|_{u_1}^{u_2} \\ &= \frac{bs+a}{1+b^2} \left[ b \sin\left(\frac{\log(bs+a)}{b}\right) - \cos\left(\frac{\log(bs+a)}{b}\right) \right] - \frac{a}{1+b^2} \left[ b \sin\left(\frac{\log(a)}{b}\right) - \cos\left(\frac{\log(a)}{b}\right) \right]. \end{aligned}$$
